# Supplementary material
Source: publisher figshare collection journal article supplement (https://asha.figshare.com/ndownloader/files/36211473)
Supplement: Supplementary file 1 [file 36211473]

**Supplemental Material S1.** Characteristics of dynamic assessments reported across 65 peer-reviewed papers studying children with communication disorders.

| Author                      | Year | Journal | Name of DA | Named approach | Study Design | Study Type               | Number of Groups   | Total participants | Age - min | Age - max | Age - mean             | Purpose                | Area of assessment | Population | Linguistically Diverse or Bilingual | Type of mediation          | Format   | Number of Instructional Sessions | Duration of Sessions | Amount of instruction provided | Measurement                                          | Post-test/gain score | Level of Prescriptiveness | Validity described | Reliability described |
|-----------------------------|------|---------|------------|----------------|--------------|--------------------------|--------------------|--------------------|-----------|-----------|------------------------|------------------------|--------------------|------------|-------------------------------------|----------------------------|----------|----------------------------------|----------------------|--------------------------------|------------------------------------------------------|----------------------|---------------------------|--------------------|-----------------------|
| Alony and Kozulin, 2007     | 2007 | ASLP    |            | MLE            | BG           | Non-diagnosis            | 2                  | 30                 | 47        | 96        | Con: 75.5;<br>Ex: 71.4 | Additional info        | Language           | DS         | N/S                                 | Attention, Task Items      | Cake     | 1                                | N/S                  | Criterion                      | Child's performance                                  | Post-test            | Flexible                  | No                 | No                    |
| Asad et al, 2013            | 2013 | CLTT    |            | MLE            | CS           | Diagnostic, non-accuracy | N/A (case studies) | 3                  | 88        | 147       | N/A                    | Diagnosis or Screening | Language           | H/I        | Some                                | Nature of task, Task Items | Sandwich | 2                                | N/S                  | Set Amount                     | Child's performance, Clinician Rating                | Gain score           | Pre-scripted              | No                 | Yes                   |
| Bain and Olswang, 1995      | 1995 | AJSLP   |            | ZPD            | WG           | Non-diagnosis            | 1                  | 15                 | 30        | 36        | N/S                    | Predict change         | Language           |            | N/S                                 | Prompting                  | Cake     | 1                                | N/S                  | Criterion                      | Amount of Instruction                                | Post-test            | Pre-scripted              | Yes                | Yes                   |
| Binger et al, 2017          | 2017 | JSLHR   |            | GP             | WG           | Non-diagnosis            | 1                  | 10                 | 39        | 59        | 50.7                   | Predict change         | AAC, Language      |            | Some                                | Prompting                  | Cake     | N/S                              | 60 mins              | Criterion                      | Amount of Instruction                                |                      | Pre-scripted              | No                 | Yes                   |
| Boyer and Martin, 2012      | 2012 | CLP     |            | IR             | WG           | Diagnostic, non-accuracy | 1                  | 29                 | 37        | 70        | 53.9                   | Diagnosis or Screening | Language           |            | Yes                                 | Task Items                 | Sandwich | 2                                | N/S                  | Set Amount                     | Child's performance                                  | Post-test            | Pre-scripted              | No                 | Yes                   |
| Camilleri and Botting, 2013 | 2013 | JLCD    | DAWL       | GP             | WG           | Diagnostic, non-accuracy | 1                  | 15                 | 42        | 51        | N/S                    | Diagnosis or Screening | Language           |            | Some                                | Task Items, Prompting      | Both     | 1                                | 35-40 mins           | Criterion                      | Amount of Instruction, Child's performance, Transfer | Post-test            | Planned                   | Yes                | Yes                   |

| Author                           | Year | Journal | Name of DA | Named approach | Study Design | Study Type               | Number of Groups   | Total participants | Age - min | Age - max | Age - mean            | Purpose                | Area of assessment | Population | Linguistically Diverse or Bilingual | Type of mediation                     | Format | Number of Instructional Sessions | Duration of Sessions | Amount of instruction provided | Measurement                                | Post-test/gain score  | Level of Prescriptiveness | Validity described | Reliability described |
|----------------------------------|------|---------|------------|----------------|--------------|--------------------------|--------------------|--------------------|-----------|-----------|-----------------------|------------------------|--------------------|------------|-------------------------------------|---------------------------------------|--------|----------------------------------|----------------------|--------------------------------|--------------------------------------------|-----------------------|---------------------------|--------------------|-----------------------|
| Camilleri and Law, 2007          | 2007 | ASLP    |            |                | WG, BG       | Non-diagnosis            | 3                  | 54                 | 41        | 50        | N/S                   | Additional info        | Language           |            | Some                                | Prompting, Task Items                 | Both   | 1                                | 45 mins              | Criterion                      | Child's performance, Amount of Instruction | Post-test             | Pre-scripted              | No                 | Yes                   |
| Camilleri and Law, 2014          | 2014 | IJSLP   |            |                | WG, BG       | Non-diagnosis            | 2                  | 40                 | 41        | 60        | N/S                   | Predict change         | Language           |            | Some                                | Task Items, Prompting                 | Both   | 1                                | 45 mins              | Criterion                      | Amount of Instruction, Child's performance | Post-test             | Pre-scripted              | No                 | Yes                   |
| Camilleri, Hasson and Dodd, 2014 | 2014 | ECP     | DAPPLE     | T-T-R, GP      | CS           | Diagnostic, non-accuracy | N/A (case studies) | 12                 | 42        | 59        | N/A                   | Diagnosis or Screening | Language, Speech   |            | Yes                                 | Task Items, Prompting, Nature of task | Both   | 1                                | 40 mins              | Criterion                      | Child's performance, Amount of Instruction | Post-test, Gain score | Pre-scripted              | No                 | No                    |
| Donaldson and Olswang, 2007      | 2007 | ASLP    |            |                | BG           | Non-diagnosis            | 2                  | 26                 | 63        | 82        | ASD: 73.6<br>TD: 68.7 | Intervention Planning  | Pragmatics         | ASD        | N/S                                 | Prompting                             | Cake   | 3                                | N/S                  | Set Amount, Criterion          | Child's performance, Amount of Instruction | Post-test             | Planned                   | No                 | Yes                   |
| Gillam and Ford, 2012            | 2012 | CLTT    |            |                | WG           | Non-diagnosis            | 1                  | 10                 | 60        | 129       | 84.9                  | Additional info        | PA/Literacy        |            | N/S                                 | Prompting                             | Cake   | 1                                | N/S                  | Criterion                      | Amount of Instruction                      |                       | Pre-scripted              | No                 | No                    |
| Glaspey and Macleod, 2010        | 2010 | CLP     | GDAP       |                | CS           | Broader Study            | N/A (case studies) | 1                  | 41        | 41        | N/A                   | Monitor change         | Speech             |            | N/S                                 | Prompting                             | Cake   | 1                                | N/S                  | Criterion                      | Amount of Instruction                      |                       | Pre-scripted              | No                 | Yes                   |

| Author                             | Year | Journal | Name of DA | Named approach | Study Design | Study Type               | Number of Groups   | Total participants | Age - min | Age - max | Age - mean | Purpose                               | Area of assessment | Population | Linguistically Diverse or Bilingual | Type of mediation         | Format   | Number of Instructional Sessions | Duration of Sessions | Amount of instruction provided | Measurement                           | Post-test/gain score | Level of Prescriptiveness | Validity described | Reliability described |
|------------------------------------|------|---------|------------|----------------|--------------|--------------------------|--------------------|--------------------|-----------|-----------|------------|---------------------------------------|--------------------|------------|-------------------------------------|---------------------------|----------|----------------------------------|----------------------|--------------------------------|---------------------------------------|----------------------|---------------------------|--------------------|-----------------------|
| Glaspey and Stoel-Gammon, 2005     | 2005 | TLD     | SSS        |                | CS           | Non-diagnosis            | N/A (case studies) | 1                  | 43        | 43        | N/A        | Monitor change, Intervention Planning | Speech             |            | N/S                                 | Prompting                 | Cake     | 1                                | N/S                  | Criterion                      | Amount of Instruction                 |                      | Pre-scripted              | No                 | No                    |
| Glaspey and Stoel-Gammon, 2007     | 2007 | ASLP    | SSS        | GP             | CS           | Non-diagnosis            | N/A (case studies) | 1                  | 4yr       | 4yr       | N/A        | Monitor change                        | Speech             |            | N/S                                 | Prompting                 | Cake     | N/S                              | N/S                  | Criterion                      | Amount of Instruction                 |                      | Pre-scripted              | No                 | No                    |
| Gutierrez-Clellen and Conboy, 1998 | 1998 | JCCD    |            | MLE            | BG           | Non-diagnosis            | 2                  | 18                 | 153       | 181       | 165        | Additional info                       | Language           | Dyslexia   | Yes                                 | Nature of task            | Sandwich | 1                                | 30 mins              | Set Amount                     | Child's performance, Transfer         | Gain score           | Planned                   | No                 | Yes                   |
| Gutierrez-Clellen and Pena, 2001   | 2001 | LSHS    |            | MLE            | CS           | Diagnostic, non-accuracy | N/A (case studies) | 2                  | 48        | 54        | N/A        | Diagnosis or Screening                | Language           |            | Yes                                 | Nature of task            | Sandwich | 2                                | 30 mins              | Set Amount                     | Child's performance, Clinician Rating | Gain score           | Planned                   | No                 | No                    |
| Hasson and Botting, 2010           | 2010 | CLTT    |            | T-T-R, MLE     | CS           | Non-diagnosis            | N/A (case studies) | 3                  | 11y       | 12y       | N/A        | Intervention Planning                 | Language           |            | N/S                                 | Prompting, Nature of task | Sandwich | 3                                | 40 mins              | Set Amount                     | Child's performance, Clinician Rating | Gain score           | Pre-scripted              | No                 | Yes                   |
| Hasson and Dodd, 2014              | 2014 | CLTT    | DASS       |                | CS           | Non-diagnosis            | N/A (case studies) | 1                  | 109       | 109       | N/A        | Intervention Planning                 | Language           |            | N/S                                 | Prompting                 | Cake     | N/S                              | N/S                  | Criterion                      | Amount of Instruction                 |                      | Planned                   | No                 | No                    |

| Author                 | Year | Journal | Name of DA | Named approach   | Study Design | Study Type               | Number of Groups   | Total participants | Age - min | Age - max | Age - mean              | Purpose                | Area of assessment | Population | Linguistically Diverse or Bilingual | Type of mediation          | Format   | Number of Instructional Sessions | Duration of Sessions                | Amount of instruction provided | Measurement                                | Post-test/gain score | Level of Prescriptiveness | Validity described | Reliability described |
|------------------------|------|---------|------------|------------------|--------------|--------------------------|--------------------|--------------------|-----------|-----------|-------------------------|------------------------|--------------------|------------|-------------------------------------|----------------------------|----------|----------------------------------|-------------------------------------|--------------------------------|--------------------------------------------|----------------------|---------------------------|--------------------|-----------------------|
| Hasson et al, 2013     | 2013 | CLIT    | DAPPLE     | T-T-R            | BG           | Diagnostic, non-accuracy | 2                  | 26                 | 3y        | 5y        | Case: 50.3<br>Con: 50.4 | Diagnosis or Screening | Language, Speech   |            | Yes                                 | Prompting, Task Items      | Both     | 1                                | 40 mins                             | Criterion                      | Amount of Instruction, Child's performance | Post-test            | Pre-scripted              | No                 | No                    |
| Hasson et al., 2012    | 2012 | IJLCD   | DASS       | GP, MLE, Testing | WG           | Non-diagnosis            | 1                  | 24                 | 98        | 129       | 111                     | Intervention Planning  | Language           |            | No                                  | Prompting                  | Cake     | 1                                | 25-40 mins                          | Criterion                      | Amount of Instruction                      |                      | Planned                   | Yes                | Yes                   |
| Hemsley et al., 2013   | 2013 | SLH     |            | T-T-R            | CS           | Broader Study            | N/A (case studies) | 1                  | 8y        | 8y        | N/A                     | Additional info        | Language           |            | Yes                                 | Nature of task             | Sandwich | 2                                | N/S                                 | Set Amount                     | Child's performance, Clinician Rating      | Gain score           | Flexible                  | No                 | No                    |
| Hemsley et al., 2014   | 2014 | SLH     |            | T-T-R            | CS           | Broader Study            | N/A (case studies) | 2                  | 102       | 140       | N/A                     | Diagnosis or Screening | Language           |            | Yes                                 | Nature of task             | Sandwich | 2                                | 45 mins                             | Set Amount                     | Child's performance, Clinician Rating      | Gain score           | Planned                   | No                 | No                    |
| Henderson et al., 2018 | 2018 | JSLHR   | PEARL      |                  | BG           | Diagnostic Accuracy      | 2                  | 90                 | 48        | 71        | 54                      | Diagnosis or Screening | Language           |            | Yes                                 | Task Items, Nature of task | Sandwich | 1                                | 30-40 mins                          | Set Amount                     | Child's performance, Clinician Rating      | Post-test            | Planned                   | Yes                | Yes                   |
| Jacobs 2001            | 2001 | CDQ     | KIDTALK    |                  | BG, WG       | Diagnostic, non-accuracy | 2                  | 60                 | 84        | 107       | 96                      | Diagnosis or Screening | Language           |            | Yes                                 | Task Items                 | Sandwich | 1                                | approximately 30 minutes per child. | Set Amount                     | Child's performance                        | Post-test            | Pre-scripted              | No                 | No                    |

| Author                      | Year | Journal | Name of DA | Named approach | Study Design | Study Type               | Number of Groups | Total participants | Age - min | Age - max | Age - mean                  | Purpose                               | Area of assessment | Population | Linguistically Diverse or Bilingual | Type of mediation          | Format   | Number of Instructional Sessions | Duration of Sessions | Amount of instruction provided | Measurement                                | Post-test/gain score | Level of Prescriptiveness | Validity described | Reliability described |
|-----------------------------|------|---------|------------|----------------|--------------|--------------------------|------------------|--------------------|-----------|-----------|-----------------------------|---------------------------------------|--------------------|------------|-------------------------------------|----------------------------|----------|----------------------------------|----------------------|--------------------------------|--------------------------------------------|----------------------|---------------------------|--------------------|-----------------------|
| Kapantzoglou et al., 2012   | 2012 | LSHSS   |            | T-T-R, MLE     | BG           | Diagnostic Accuracy      | 2                | 28                 |           |           | TLD: 57<br>PLI: 54          | Diagnosis or Screening                | Language           |            | Yes                                 | Task Items, Nature of task | Sandwich | 1                                | 30–40 min            | Set Amount                     | Child's performance, Clinician Rating      | Post-test            | Pre-scripted              | No                 | Yes                   |
| Kelley and Goldstein, 2019  | 2019 | SSL     | EWLM       |                | WG, BG       | Non-diagnosis            | 2                | 16                 | 45        | 62        | 54                          | Predict change                        | Language           |            | N/S                                 | Task Items, Prompting      | Both     | 1                                | N/S                  | Set Amount                     | Child's performance, Amount of Instruction | Post-test            | Pre-scripted              | No                 | Yes                   |
| Keske-Soares et al., 2018   | 2018 | CoDAS   | DEMSS-BP   |                | BG           | Diagnostic, non-accuracy | 3                | 18                 | 53        | 68        | TD: 59<br>PD: 60<br>CAS: 59 | Diagnosis or Screening                | Speech             |            | N/S                                 | Prompting                  | Cake     | N/S                              | N/S                  | Criterion                      | Amount of Instruction                      |                      | Planned                   | No                 | No                    |
| King et al., 2015           | 2015 | AAC     |            | GP             | WG           | Non-diagnosis            | 1                | 4                  | 60        | 70        | 65                          | Predict change, Intervention Planning | AAC, Language      |            | No                                  | Prompting                  | Cake     | 4 to 6                           | 60 mins              | Criterion                      | Amount of Instruction                      |                      | Pre-scripted              | Yes                | Yes                   |
| Kramer et al., 2009         | 2009 | CJSLPA  | DAI        | T-T-R          | BG           | Diagnostic Accuracy      | 2                | 17                 |           |           | Grade 3                     | Diagnosis or Screening                | Language           |            | Yes                                 | Nature of task, Task Items | Sandwich | 2                                | N/S                  | Set Amount                     | Clinician Rating, Child's performance      | Gain score           | Planned                   | No                 | Yes                   |
| Lederberg and Spencer, 2009 | 2009 | JDSDE   |            |                | WG, BG       | Experimental task        | 1                | 98                 | 27        | 82        | 55                          | Intervention Planning                 | Language           | H/I        | Some                                | Task Items                 | Cake     | 2                                | N/S                  | Set Amount                     | Child's performance                        | Post-test            | Pre-scripted              | No                 | No                    |

| Author                      | Year | Journal | Name of DA | Named approach | Study Design | Study Type               | Number of Groups   | Total participants | Age - min | Age - max | Age - mean           | Purpose                | Area of assessment | Population | Linguistically Diverse or Bilingual | Type of mediation          | Format                    | Number of Instructional Sessions | Duration of Sessions | Amount of instruction provided | Measurement                                | Post-test/gain score | Level of Prescriptiveness | Validity described | Reliability described |
|-----------------------------|------|---------|------------|----------------|--------------|--------------------------|--------------------|--------------------|-----------|-----------|----------------------|------------------------|--------------------|------------|-------------------------------------|----------------------------|---------------------------|----------------------------------|----------------------|--------------------------------|--------------------------------------------|----------------------|---------------------------|--------------------|-----------------------|
| Lidz and Peña, 1996         | 1996 | LSHSS   |            | MLE            | CS           | Diagnostic, non-accuracy | N/A (case studies) | 2                  | 47        | 49        | N/A                  | Diagnosis or Screening | Language           |            | Yes                                 | Task Items, Nature of task | Sandwich                  | 2                                | 20 mins              | Set Amount                     | Child's performance, Clinician Rating      | Gain score           | Planned                   | No                 | No                    |
| Long and Olswang, 1996      | 1996 | AJSLP   |            |                | WG           | Non-diagnosis            | 2                  | 21                 | 31        | 36        | Not provided         | Intervention Planning  | Language           |            | N/S                                 | Prompting                  | Cake                      | N/S                              | N/S                  | Criterion                      | Amount of Instruction                      |                      | Pre-scripted              | No                 | No                    |
| Macleod and Glaspey, 2014   | 2014 | CLP     | GDAP       |                | CS           | Broader Study            | N/A (case studies) | 3                  | 36        | 36        | N/A                  | Monitor change         | Speech             |            | No                                  | Prompting                  | Cake                      | 1                                | N/S                  | Criterion                      | Amount of Instruction                      |                      | Pre-scripted              | No                 | Yes                   |
| Mann et al., 2014           | 2014 | JCD     |            | MLE            | CS           | Non-diagnosis            | N/A (case studies) | 2                  | 88        | 102       | N/A                  | Additional info        | Language, AAC      | H/I        | Some                                | Task Items, Nature of task | Sandwich but no post test | 2                                | 30 mins              | Set Amount                     | Time for task completion, Clinician Rating |                      | Pre-scripted              | Yes                | No                    |
| Mann et al., 2015           | 2015 | AJSLP   |            | MLE            | BG           | Diagnostic Accuracy      | 2                  | 37                 | 75        | 135       | 102.8                | Diagnosis or Screening | Language, AAC      | H/I        | Some                                | Task Items, Nature of task | Sandwich but no post test | 2                                | 30 mins              | Set Amount                     | Clinician Rating                           |                      | Pre-scripted              | Yes                | Yes                   |
| Maragkaki and Hessels, 2017 | 2017 | JSE     | DAPPLE     | T-T-R, GP      | BG           | Diagnostic, non-accuracy | 2                  | 12                 |           |           | Case: 58.7, TD: 43.7 | Diagnosis or Screening | Language           |            | Yes                                 | Task Items, Prompting      | Both                      | 1                                | N/S                  | Criterion                      | Amount of Instruction, Child's performance | Post-test            | Pre-scripted              | Yes                | No                    |

| Author                       | Year | Journal | Name of DA | Named approach | Study Design | Study Type               | Number of Groups   | Total participants | Age - min     | Age - max     | Age - mean | Purpose                | Area of assessment | Population       | Linguistically Diverse or Bilingual | Type of mediation          | Format   | Number of Instructional Sessions | Duration of Sessions | Amount of instruction provided | Measurement                                | Post-test/gain score | Level of Prescriptiveness | Validity described | Reliability described |
|------------------------------|------|---------|------------|----------------|--------------|--------------------------|--------------------|--------------------|---------------|---------------|------------|------------------------|--------------------|------------------|-------------------------------------|----------------------------|----------|----------------------------------|----------------------|--------------------------------|--------------------------------------------|----------------------|---------------------------|--------------------|-----------------------|
| Martin, 2015                 | 2015 | LT      | DAI        | MLE            | CS           | Diagnostic, non-accuracy | N/A (case studies) | 3                  | N/S (6-7 yrs) | N/S (6-7 yrs) | N/A        | Diagnosis or Screening | Language           |                  | Some                                | Nature of task, Task Items | Sandwich | 2                                | 20 mins              | Set Amount                     | Child's performance, Clinician Rating      | Gain score           | Planned                   | No                 | Yes                   |
| McLaughlin and Cascella 2008 | 2008 | CDQ     |            |                | CS           | Non-diagnosis            | N/A (case studies) | 6                  | 107           | 156           | N/A        | Intervention Planning  | Pre-verbal         | GDD/IDD          | N/S                                 | Prompting                  | Cake     | 3                                | 30 to 45 mins        | Criterion                      | Amount of Instruction, Child's performance | Post-test            | Pre-scripted              | No                 | Yes                   |
| McNaughton, 1991             | 1991 | JSLPA   |            |                | CS           | Broader Study            | N/A (case studies) | 1                  | 79            | 79            | N/A        | Intervention Planning  | AAC                | Acquired aphasia | N/S                                 | N/S                        | N/S      | N/S                              | N/S                  | N/S                            | N/S                                        |                      | N/S                       | No                 | No                    |
| Olswang and Bain, 1996       | 1996 | JSHR    |            |                | WG           | Non-diagnosis            | 1                  | 21                 | 31            | 36            | 32.6       | Predict change         | Language           |                  | N/S                                 | Prompting                  | Cake     | 1                                | N/S                  | Criterion                      | Amount of Instruction                      |                      | Pre-scripted              | No                 | No                    |
| Olswang et al., 1986         | 1986 | CLTT    |            |                | CS           | Non-diagnosis            | N/A (case studies) | 2                  | 28            | 34            | N/A        | Predict change         | Language           |                  | No                                  | Prompting                  | Cake     | 2                                | 30 mins              | Set Amount                     | Child's performance                        | Post-test            | Pre-scripted              | Yes                | Yes                   |
| Olswang et al., 2013         | 2013 | AJSLP   |            | MLE, GP        | WG           | Non-diagnosis            | 1                  | 6                  | 11            | 24            | 18.3       | Predict change         | Pre-verbal         | Motor diff.      | Some                                | Prompting                  | Cake     | 1                                | 20-30 mins           | Criterion                      | Amount of Instruction                      |                      | Flexible                  | Yes                | Yes                   |

| Author                                | Year | Journal | Name of DA | Named approach | Study Design | Study Type               | Number of Groups | Total participants | Age - min | Age - max | Age - mean                                      | Purpose                | Area of assessment | Population | Linguistically Diverse or Bilingual | Type of mediation          | Format                    | Number of Instructional Sessions | Duration of Sessions | Amount of instruction provided | Measurement                           | Post-test/gain score | Level of Prescriptiveness | Validity described | Reliability described |
|---------------------------------------|------|---------|------------|----------------|--------------|--------------------------|------------------|--------------------|-----------|-----------|-------------------------------------------------|------------------------|--------------------|------------|-------------------------------------|----------------------------|---------------------------|----------------------------------|----------------------|--------------------------------|---------------------------------------|----------------------|---------------------------|--------------------|-----------------------|
| Peña et al., 1992                     | 1992 | TJSE    |            | MLE            | BG           | Diagnostic, non-accuracy | 2                | 50                 | 43        | 57        | Not provided                                    | Diagnosis or Screening | Language           |            | Yes                                 | Nature of task, Task Items | Sandwich                  | 2                                | 20 mins              | Set Amount                     | Child's performance, Clinician Rating | Gain score           | Flexible                  | No                 | No                    |
| Peña et al., 2001                     | 2001 | AJSLP   |            | MLE            | BG           | Diagnostic Accuracy      | 2                | 79                 | 45        | 57        | 50                                              | Diagnosis or Screening | Language           |            | Some                                | Nature of task             | Sandwich                  | 2                                | 30 mins              | Set Amount                     | Child's performance, Clinician Rating | Gain score           | Planned                   | Yes                | Yes                   |
| Peña et al., 2006 - second experiment | 2006 | JSLHR   |            | MLE            | BG           | Diagnostic Accuracy      | 3                | 71                 |           |           | N/S – 1 <sup>st</sup> and 2 <sup>nd</sup> grade | Diagnosis or Screening | Language           |            | N/S                                 | Nature of task, Task Items | Sandwich                  | 2                                | 30 mins              | Set Amount                     | Child's performance, Clinician Rating | Gain score           | Pre-scripted              | Yes                | Yes                   |
| Peña et al., 2007                     | 2007 | ASLP    |            | MLE            | BG           | Diagnostic Accuracy      | 2                | 40                 | 78        | 101       | 89                                              | Diagnosis or Screening | Language           |            | N/S                                 | Nature of task, Task Items | Sandwich but no post test | 2                                | 30 mins              | Set Amount                     | Clinician Rating                      |                      | Pre-scripted              | Yes                | Yes                   |
| Peña et al., 2014                     | 2014 | JSLHR   | DAI        | MLE            | BG           | Diagnostic Accuracy      | 3                | 54                 |           |           | LD: 68.4, TD-M: 68.9, TD-C: 69.8                | Diagnosis or Screening | Language           |            | Yes                                 | Nature of task, Task Items | Sandwich                  | 2                                | 30 mins              | Set Amount                     | Child's performance, Clinician Rating | Gain score           | Pre-scripted              | Yes                | Yes                   |
| Peña, 2000 - study 1                  | 2000 | CDQ     |            | MLE            | BG           | Diagnostic Accuracy      | 2                | Study 1: 50        | 44        | 58        | 50                                              | Diagnosis or Screening | Language           |            | Some                                | Nature of task             | Sandwich                  | 2                                | 20 mins              | Set Amount                     | Child's performance, Clinician Rating | Gain score           | N/S                       | Yes                | No                    |



| Author                    | Year | Journal | Name of DA | Named approach | Study Design | Study Type               | Number of Groups   | Total participants | Age - min | Age - max | Age - mean             | Purpose                | Area of assessment | Population      | Linguistically Diverse or Bilingual | Type of mediation                     | Format   | Number of Instructional Sessions | Duration of Sessions | Amount of instruction provided | Measurement                           | Post-test/gain score  | Level of Prescriptiveness | Validity described | Reliability described |
|---------------------------|------|---------|------------|----------------|--------------|--------------------------|--------------------|--------------------|-----------|-----------|------------------------|------------------------|--------------------|-----------------|-------------------------------------|---------------------------------------|----------|----------------------------------|----------------------|--------------------------------|---------------------------------------|-----------------------|---------------------------|--------------------|-----------------------|
| Peña, 2000 - study 2      |      |         |            | MLE            | BG           | Diagnostic Accuracy      | 2                  | Study 2: 55        | 45        | 57        | 50                     | Diagnosis or Screening | Language           |                 | Some                                | Nature of task                        | Sandwich | 2                                | 30 mins              | Set Amount                     | Clinician Rating                      |                       | N/S                       | Yes                | Yes                   |
| Petersen and Gillam, 2015 | 2015 | JLD     |            |                | WG           | Diagnostic Accuracy      | 1                  | 63                 |           |           | 65.3                   | Diagnosis or Screening | PA/Literacy        |                 | Yes                                 | Task Items, Nature of task            | Sandwich | 1                                | 3 mins               | Set Amount                     | Child's performance, Clinician Rating | Gain score            | Pre-scripted              | Yes                | Yes                   |
| Petersen et al., 2017     | 2017 | JSLHR   |            |                | BG           | Diagnostic Accuracy      | 2                  | 42                 | 76        | 114       | 91                     | Diagnosis or Screening | Language           |                 | Yes                                 | Nature of task, Task Items            | Sandwich | 2                                | 25-30 mins           | Set Amount                     | Child's performance, Clinician Rating | Gain score, Post-test | Planned                   | Yes                | Yes                   |
| Petersen et al., 2020     | 2020 | LSHS    |            | T-T-R, MLE     | BG           | Diagnostic Accuracy      | 2                  | 31                 | 69        | 115       | 93                     | Diagnosis or Screening | Language           |                 | Yes                                 | Task Items, Nature of task, Prompting | Sandwich | 1                                | 15 mins              | Set Amount                     | Child's performance, Clinician Rating | Post-test             | Pre-scripted              | Yes                | Yes                   |
| Regalla and Peker, 2017   | 2017 | FLA     |            |                | BG, WG       | Non-diagnosis            | 2                  | 31                 |           |           | N/S - pre-kindergarten | Additional info        | Language           | ASD, H/I, GDD/I | N/S                                 | Prompting                             | Cake     | 1                                | N/S                  | Criterion                      | Amount of Instruction                 |                       | Pre-scripted              | No                 | Yes                   |
| Resendiz and Peña, 2015   | 2015 | Dialog  |            | MLE            | CS           | Diagnostic, non-accuracy | N/A (case studies) | 2                  |           |           | N/A - Kindergarten age | Diagnosis or Screening | Language           |                 | Yes                                 | Nature of task, Task Items            | Sandwich | 2                                | 30 mins              | Set Amount                     | Child's performance, Clinician Rating | Gain score            | Pre-scripted              | No                 | No                    |

| Author                         | Year | Journal | Name of DA | Named approach | Study Design | Study Type               | Number of Groups   | Total participants | Age - min | Age - max | Age - mean                | Purpose                                | Area of assessment | Population  | Linguistically Diverse or Bilingual | Type of mediation          | Format   | Number of Instructional Sessions | Duration of Sessions      | Amount of instruction provided | Measurement           | Post-test/gain score | Level of Prescriptiveness | Validity described | Reliability described |
|--------------------------------|------|---------|------------|----------------|--------------|--------------------------|--------------------|--------------------|-----------|-----------|---------------------------|----------------------------------------|--------------------|-------------|-------------------------------------|----------------------------|----------|----------------------------------|---------------------------|--------------------------------|-----------------------|----------------------|---------------------------|--------------------|-----------------------|
| Roseberry and Connell, 1991    | 1991 | JSHR    |            | Invented Rule  | BG           | Diagnostic, non-accuracy | 2                  | 26                 | 53        | 76        | TD: 68, LD: 65.6          | Diagnosis or Screening                 | Language           |             | Yes                                 | Task Items                 | Sandwich | 2                                | 15-20 mins                | Set Amount                     | Child's performance   | Post-test            | Pre-scripted              | Yes                | Yes                   |
| Snell, 2002                    | 2002 | AAC     |            | T-T-R          | CS           | Non-diagnosis            | N/A (case studies) | 3                  | 6y        | 40y       | N/A                       | Additional info, Intervention Planning | Pre-verbal         | ASD, GDD/ID | N/S                                 | Prompting                  | Cake     | 1                                | 90-120 minutes + planning | Criterion                      | Child's performance   |                      | Planned                   | No                 | No                    |
| Spencer et al., 2015 - phase 1 | 2015 | AJSLP   |            | T-T-R          | WG           | Diagnostic, non-accuracy | 1                  | 41                 |           |           | N/S - preschool           | Diagnosis or Screening                 | Language           |             | Some                                | Nature of task, Task Items | Sandwich | 3                                | 15-20 mins                | Set Amount                     | Child's performance   | Gain score           | Planned                   | No                 | No                    |
| Steele, 2015                   | 2015 | IJSLP   |            | GP             | BG           | Broader Study            | 3                  | 39                 | 81        | 141       | LD: 127, AM: 126, VM: 103 | Additional info                        | Language           |             | N/S                                 | Prompting                  | Cake     | 1                                | N/S                       | Criterion                      | Amount of Instruction |                      | Pre-scripted              | No                 | Yes                   |
| Steele et al., 2013            | 2013 | IJSLP   |            | GP             | BG           | Broader Study            | 2                  | 23                 | 9y        | 11y       | LI: 123.8 TD: 128.2       | Additional info                        | Language           |             | No                                  | Prompting                  | Cake     | 4-Jun                            | N/S                       | Criterion                      | Amount of Instruction |                      | Pre-scripted              | No                 | Yes                   |
| Strand et al., 2013            | 2013 | IJLHR   | DEMSS      |                | WG           | Diagnostic Accuracy      | 1                  | 81                 | 36        | 79        | 54.7                      | Diagnosis or Screening                 | Speech             |             | No                                  | Prompting                  | Cake     | 1                                | 7-25 mins                 | Criterion                      | Amount of Instruction |                      | Planned                   | Yes                | Yes                   |

| Author                          | Year | Journal | Name of DA | Named approach | Study Design | Study Type               | Number of Groups | Total participants | Age - min | Age - max | Age - mean             | Purpose                | Area of assessment | Population | Linguistically Diverse or Bilingual | Type of mediation          | Format   | Number of Instructional Sessions | Duration of Sessions | Amount of instruction provided | Measurement                           | Post-test/gain score | Level of Prescriptiveness | Validity described | Reliability described |
|---------------------------------|------|---------|------------|----------------|--------------|--------------------------|------------------|--------------------|-----------|-----------|------------------------|------------------------|--------------------|------------|-------------------------------------|----------------------------|----------|----------------------------------|----------------------|--------------------------------|---------------------------------------|----------------------|---------------------------|--------------------|-----------------------|
| Thomas et al., 2018             | 2018 | CACD    | NDAPD      | GP             | BG           | Non-diagnosis            | 2                | 60                 | 76        | 100       | SSD: 87, TD: 87        | Additional info        | PA/Literacy        |            | No                                  | Prompting                  | Cake     | N/S                              | N/S                  | Criterion                      | Amount of Instruction                 |                      | Pre-scripted              | No                 | Yes                   |
| Tyler, 1996                     | 1996 | JCD     |            |                | BG           | Non-diagnosis            | 2                | 20                 | 22        | 40        | TD: 24; LD: 33         | Intervention Planning  | Speech             |            | N/S                                 | Prompting                  | Cake     | 1                                | 60 min               | Set Amount                     | Child's performance                   | Post-test            | Pre-scripted              | No                 | No                    |
| Tzuriel and Groman, 2017 - CPUT | 2017 | JCEP    | CPUT       | GP             | BG           | Broader Study            | 2                | 64                 |           |           | TD: 112, ASD: 112      | Additional info        | Language           | ASD        | N/S                                 | Prompting                  | Cake     | 1                                | N/S                  | Set Amount                     | Child's performance                   |                      | Pre-scripted              | No                 | Yes                   |
| Tzuriel and Groman, 2017 - CMCT | 2017 | JCEP    | CMCT       | GP             | BG           | Broader Study            | 2                | 64                 |           |           | TD: 112, ASD: 112      | Additional info        | Language           | ASD        | N/S                                 | Prompting                  | Cake     | 1                                | N/S                  | Criterion                      | Amount of Instruction                 |                      | Pre-scripted              | No                 | Yes                   |
| Ukrainetz et al., 2000          | 2000 | LSHSS   |            | MLE            | BG           | Diagnostic, non-accuracy | 2                | 23                 |           |           | N/S - Kindergarten age | Diagnosis or Screening | Language           |            | No                                  | Task Items, Nature of task | Sandwich | 2                                | 30 mins              | Set Amount                     | Clinician Rating, Child's performance | Gain score           | Planned                   | No                 | Yes                   |
| Wade and Haynes, 1989           | 1989 | CLTT    |            |                | BG           | Non-diagnosis            | 2                | 18                 | 18        | 44        | LD: 36, TD: 20.3       | Additional info        | Language           |            | No                                  | Prompting                  | Cake     | 1                                | 120 mins             | Set Amount                     | Child's performance                   | Post-test            | Planned                   | No                 | Yes                   |

| Author               | Year | Journal | Name of DA | Named approach | Study Design | Study Type    | Number of Groups   | Total participants | Age - min | Age - max | Age - mean | Purpose        | Area of assessment | Population | Linguistically Diverse or Bilingual | Type of mediation | Format   | Number of Instructional Sessions | Duration of Sessions | Amount of instruction provided | Measurement         | Post-test/gain score | Level of Prescriptiveness | Validity described | Reliability described |
|----------------------|------|---------|------------|----------------|--------------|---------------|--------------------|--------------------|-----------|-----------|------------|----------------|--------------------|------------|-------------------------------------|-------------------|----------|----------------------------------|----------------------|--------------------------------|---------------------|----------------------|---------------------------|--------------------|-----------------------|
| Weismer et al., 1993 | 1993 | JSHR    |            |                | CS           | Non-diagnosis | N/A (case studies) | 4                  | 25        | 26        | N/A        | Predict change | Language           |            | No                                  | Nature of task    | Sandwich | 2                                | N/S                  | Set Amount                     | Child's performance | Post-test            | Planned                   | No                 | Yes                   |

#### Abbreviations:

TD= typically developing; LD= language disorder; N/S= Not specified; N/A=Not appropriate; Con= control group; Ex= experimental group, Case= caseload group

Age: age is given in months unless paper only provides age range in years (e.g. 3-5 year olds)

Type of Instruction: Attention= Instruction about attention or behaviour; Task Items=Instruction about task items or skills; Nature of Task= Instruction about task or nature of task; Child's Performance= Child's performance following instruction; Clinician Rating= Clinician's rating of child's modifiability; Amount of Instruction= Quantitative measure of amount of instruction; Transfer= Measurement of transfer to another task

Amount of Instruction: Criterion= Until child reaches or fails to reach set criterion; Set Amount= Set Amount of Instruction

Study Design: BG= between groups; WG=within group; CS=case study or single subject design; Broader Study= DA used as one part of broader study

Co-occurring conditions: H/I= Hearing impairment; GDD= Global developmental delay; ID= Intellectual Disability; DS= Down Syndrome; ASD= Autism Spectrum Disorder

Named theoretical approach: MLE=Mediated Learning Experience; ZPD=Zone of Proximal Development; GP=Graduated Prompting; T-T-R=Test-Train-Retest; IR= Invented Rule

Journals: ASLP= Advances in Speech Language Pathology; CLTT= Child Language Teaching and Therapy; AJSLP= American Journal of Speech-Language Pathology; JSLHR= Journal of Speech, Language, and Hearing Research; CLP= Clinical Linguistics & Phonetics; IJLCD= International Journal of Language & Communication Disorders; IUSLP= International Journal of Speech-Language Pathology; ECP= Educational & Child Psychology; TLD= Topics in Language Disorders; JCCD= Journal of Children's Communication Development; LSHSS= Language, Speech and Hearing Services in Schools; SLH= Speech, Language and Hearing; CDQ= Communication Disorders Quarterly; SSL= Seminars in Speech and Language; AAC= AAC: Augmentative & Alternative Communication; CJSIPA= Canadian Journal of Speech-Language Pathology and Audiology; JDSDE= Journal of Deaf Studies & Deaf Education; JCD= Journal of Communication Disorders; JSE= Journal of Studies in Education; LT= Language Teaching; JSLPA= Journal of Speech-Language Pathology and Audiology; JSHR= Journal of Speech and Hearing Research; TJSE= The Journal of Special Education; JLD= Journal of Learning Disabilities; FLA= Foreign Language Annals; Dialog= Dialog: Journal of the Texas Educational Diagnosticians Association; CACD= Clinical Archives of Communication Disorders; JCEP= Journal of Cognitive Education and Psychology

Assessments: DAWL= Dynamic Assessment of Word Learning; DAPPLE= Dynamic Assessment of Preschoolers' Proficiency in Learning English; GDAP= Glaspey Dynamic Assessment of Phonology; SSS= Scaffolding Scale of Stimulability; DASS= Dynamic Assessment of Sentence Structure; PEARL= Predictive Early Assessment of Reading and Language; KIDTALK= Kidtalk Interactive Dynamic Test of Aptitude for Language Knowledge; EWLM= Explicit Word Learning Measure; DEMSS= Dynamic Evaluation of Motor Speech Skill; DEMSS-BP= Dynamic Evaluation of Motor Speech Skill (Brazilian Portuguese); DAI= Dynamic Assessment and Intervention; NDAPD= Nonverbal dynamic assessment of phoneme deletion; CPUT= Children's Proverbial Understanding Test; CMCT= The Children's Metaphorical Construction Test

#### References:

- Alony, S., & Kozulin, A. (2007). Dynamic assessment of receptive language in children with Down syndrome. *Advances in Speech Language Pathology*, 9(4), 323-331. <http://dx.doi.org/10.1080/14417040701291415>
- Asad, A. N., Hand, L., Fairgray, L., & Purdy, S. C. (2013). The use of dynamic assessment to evaluate narrative language learning in children with hearing loss: Three case studies. *Child Language Teaching and Therapy*, 29(3), 319-342. <http://dx.doi.org/10.1177/0265659012467994>
- Bain, B. A., & Olswang, L. B. (1995). Examining readiness for learning two-word utterances by children with specific expressive language impairment: Dynamic assessment validation. *American Journal of Speech-Language Pathology*, 4(1), 81-91. <https://doi.org/10.1044/1058-0360.0401.81>
- Binger, C., Kent-Walsh, J., & King, M. (2017). Dynamic assessment for 3- and 4-year-old children who use augmentative and alternative communication: Evaluating expressive syntax. *Journal of Speech, Language, and Hearing Research*, 60(7), 1946-1958. [https://doi.org/10.1044/2017\\_JSLHR-L-15-0269](https://doi.org/10.1044/2017_JSLHR-L-15-0269)
- Boyer, V. E., & Martin, K. Y. (2012). Invented rule with English language learners. *Clinical Linguistics and Phonetics*, 26(7), 613-627. <https://doi.org/10.3109/02699206.2012.682694>
- Camilleri, B., & Botting, N. (2013). Beyond static assessment of children's receptive vocabulary: The Dynamic Assessment of Word Learning (DAWL). *International Journal of Language and Communication Disorders*, 48(5), 565-581. <http://dx.doi.org/10.1111/1460-6984.12033>
- Camilleri, B., Hasson, N., & Dodd, B. (2014). Dynamic assessment of bilingual children's language at the point of referral. *Educational and Child Psychology*, 31(2), 57-72.

- Camilleri, B., & Law, J. (2007). Assessing children referred to speech and language therapy: Static and dynamic assessment of receptive vocabulary. *Advances in Speech Language Pathology*, 9(4), 312-322. <http://dx.doi.org/10.1080/14417040701624474>
- Camilleri, B., & Law, J. (2014). Dynamic assessment of word learning skills of pre-school children with primary language impairment. *International Journal of Speech Language Pathology*, 16(5), 507-516. <https://dx.doi.org/10.3109/17549507.2013.847497>
- Donaldson, A. L., & Olswang, L. B. (2007). Investigating requests for information in children with autism spectrum disorders: Static versus dynamic assessment. *Advances in Speech Language Pathology*, 9(4), 297-311. <http://dx.doi.org/10.1080/14417040701413720>
- Gillam, S. L., & Ford, M. B. (2012). Dynamic assessment of phonological awareness for children with speech sound disorders. *Child Language Teaching and Therapy*, 28(3), 297-308. <http://dx.doi.org/10.1177/0265659012448087>
- Glaspey, A., & Stoel-Gammon, C. (2007). A dynamic approach to phonological assessment. *Advances in Speech Language Pathology*, 9(4), 286-296. <http://dx.doi.org/10.1080/14417040701435418>
- Glaspey, A. M., & MacLeod, A. A. N. (2010). A multi-dimensional approach to gradient change in phonological acquisition: A case study of disordered speech development. *Clinical Linguistics and Phonetics*, 24(4), 283-299. <http://dx.doi.org/10.3109/02699200903581091>
- Glaspey, A. M., & Stoel-Gammon, C. (2005). Dynamic assessment in phonological disorders: The scaffolding scale of stimulability. *Topics in Language Disorders*, 25(3), 220-230.
- Gutierrez-Clellen, V. F., Conboy, B., Brown, S., & Robinson-Zañartu, C. (1998). Modifiability: A dynamic approach to assessing immediate language change. *Journal of Children's Communication Development*, 19(2), 31-42. <http://dx.doi.org/10.1177/152574019801900204>
- Gutierrez-Clellen, V. F., & Pena, E. (2001). Dynamic assessment of diverse children: A tutorial. *Language, Speech, and Hearing Services in Schools*, 32(4), 212-224. <http://dx.doi.org/10.1044/0161-1461%282001/019%29>
- Hasson, N., & Botting, N. (2010). Dynamic assessment of children with language impairments: A pilot study. *Child Language Teaching and Therapy*, 26(3), 249-272. <https://doi.org/10.1177/0265659009349982>
- Hasson, N., Camilleri, B., Jones, C., Smith, J., & Dodd, B. (2013). Discriminating disorder from difference using dynamic assessment with bilingual children. *Child Language Teaching and Therapy*, 29(1), 57-75. <http://dx.doi.org/10.1177/0265659012459526>
- Hasson, N., & Dodd, B. (2014). Planning intervention using dynamic assessments: A case study. *Child Language Teaching and Therapy*, 30(3), 353-366. <http://dx.doi.org/10.1177/0265659014521642>
- Hasson, N., Dodd, B., & Botting, N. (2012). Dynamic Assessment of Sentence Structure (DASS): Design and evaluation of a novel procedure for the assessment of syntax in children with language impairments. *International Journal of Language & Communication Disorders*, 47(3), 285-299. <https://dx.doi.org/10.1111/j.1460-6984.2011.00108.x>
- Hemsley, G., Holm, A., & Dodd, B. (2013). A bilingual child's language profile: Impaired English but intact Vietnamese. *Speech, Language and Hearing*, 16(3), 127-138. <http://dx.doi.org/10.1179/2050571X13Z.00000000013>
- Hemsley, G., Holm, A., & Dodd, B. (2014). Identifying language difference versus disorder in bilingual children. *Speech, Language and Hearing*, 17(2), 101-115. <http://dx.doi.org/10.1179/2050572813Y.00000000027>
- Henderson, D. E., Restrepo, M. A., & Aiken, L. S. (2018). Dynamic assessment of narratives among Navajo preschoolers. *Journal of Speech, Language, and Hearing Research*, 61(10), 2547-2560. [http://dx.doi.org/10.1044/2018\\_JSLHR-L-17-0313](http://dx.doi.org/10.1044/2018_JSLHR-L-17-0313)
- Jacobs, E. L., & Coufal, K. L. (2001). A computerized screening instrument of language learnability. *Communication Disorders Quarterly*, 22(2), 67-75. <https://doi.org/10.1177/152574010102200202>
- Kapantzoglou, M., Restrepo, M., & Thompson, M. S. (2012). Dynamic assessment of word learning skills: Identifying language impairment in bilingual children. *Language, Speech, and Hearing Services in Schools*, 43(1), 81-96. [https://doi.org/10.1044/0161-1461\(2011/10-0095\)](https://doi.org/10.1044/0161-1461(2011/10-0095))
- Kelley, E. S., & Goldstein, H. (2019). Examining performance on a process-based assessment of word learning in relation to vocabulary knowledge and learning in vocabulary intervention. *Seminars in speech and language*, 40(05), 344-358. <https://doi.org/10.1055/s-0039-1688447>

- Keske-Soares, M., Uberti, L. B., Gubiani, M. B., Gubiani, M. B., Ceron, M. I., & Pagliarin, K. C. (2018). Performance of children with speech sound disorders in the dynamic evaluation of motor speech skills. *CoDAS*, 30(2), e20170037. <https://dx.doi.org/10.1590/2317-1782/20182017037>
- King, M. R., Binger, C., & Kent-Walsh, J. (2015). Using dynamic assessment to evaluate the expressive syntax of children who use augmentative and alternative communication. *AAC: Augmentative & Alternative Communication*, 31(1), 1-14. <https://dx.doi.org/10.3109/07434618.2014.995779>
- Kramer, K., Mallett, P., Schneider, P., & Hayward, D. (2009). Dynamic assessment of narratives with grade 3 children in a first nations community. *Canadian Journal of Speech-Language Pathology and Audiology*, 33(3), 119-128.
- Lederberg, A. R., & Spencer, P. E. (2009). Word-learning abilities in deaf and hard-of-hearing preschoolers: effect of lexicon size and language modality. *Journal of Deaf Studies & Deaf Education*, 14(1), 44-62. <https://dx.doi.org/10.1093/deafed/enn021>
- Lidz, C. S., & Pena, E. D. (1996). Dynamic assessment: The model, its relevance as a nonbiased approach, and its application to Latino American preschool children. *Language, Speech, and Hearing Services in Schools*, 27(4), 367-372. <http://dx.doi.org/10.1044/0161-1461.2704.367>
- Long, S. H., & Olswang, L. B. (1996). Readiness and patterns of growth in children with SELI. *American Journal of Speech-Language Pathology*, 5(1), 79-85. <https://doi.org/10.1044/1058-0360.0501.79>
- MacLeod, A. A. N., & Glaspey, A. M. (2014). A multidimensional view of gradient change in velar acquisition in three-year-olds receiving phonological treatment. *Clinical Linguistics & Phonetics*, 28(9), 664-681. <https://doi.org/10.3109/02699206.2013.878855>
- Mann, W., Pena, E. D., & Morgan, G. (2014). Exploring the use of dynamic language assessment with deaf children, who use American Sign Language: Two case studies. *Journal of Communication Disorders*, 52, 16-30. <https://doi.org/10.1016/j.jcomdis.2014.05.002>
- Mann, W., Pena, E. D., & Morgan, G. (2015). Child modifiability as a predictor of language abilities in deaf children who use American Sign Language. *American Journal of Speech-Language Pathology*, 24(3), 374-385. [https://dx.doi.org/10.1044/2015\\_AJSLP-14-0072](https://dx.doi.org/10.1044/2015_AJSLP-14-0072)
- Maragkaki, I., & Hessels, M. G. (2017). A pilot study of dynamic assessment of vocabulary in German for bilingual preschoolers in Switzerland. *Journal of Studies in Education*, 7(1), 32-49. <https://doi.org/10.5296/jse.v7i1.10392>
- Martin, D. (2015). Dynamic assessment of language disabilities. *Language Teaching*, 48(1), 51-68. <http://dx.doi.org/10.1017/S026144481200016X>
- McLaughlin, K., & Cascella, P. W. (2008). Eliciting a distal gesture via dynamic assessment among students with moderate to severe intellectual disability. *Communication Disorders Quarterly*, 29(2), 75-81. <http://dx.doi.org/10.1177/1525740107311821>
- McNaughton, D. (1991). Augmentative and alternative communication intervention for a child with acquired aphasia with convulsive disorder: A case study. *Journal of Speech-Language Pathology and Audiology*, 15(2), 35-41.
- Olswang, L. B., & Bain, B. A. (1996). Assessment information for predicting upcoming change in language production. *Journal of Speech and Hearing Research*, 39(2), 414-423. <https://doi.org/10.1044/jshr.3902.414>
- Olswang, L. B., Bain, B. A., Rosendahl, P. D., Oblak, S. B., & Smith, A. E. (1986). Language learning: Moving performance from a context-dependent to -independent State. *Child Language Teaching and Therapy*, 2(2), 180-210. <https://doi.org/10.1177/026565908600200205>
- Olswang, L. B., Feuerstein, J. L., Lloyd Pinder, G., & Dowden, P. (2013). Validating dynamic assessment of triadic gaze for young children with severe disabilities. *American Journal of Speech-Language Pathology*, 22(3), 449-462. [https://doi.org/10.1044/1058-0360\(2012/12-0013](https://doi.org/10.1044/1058-0360(2012/12-0013)
- Peña, E., & Iglesias, A. (1992). The application of dynamic methods to language assessment: A nonbiased procedure. *The Journal of Special Education*, 26(3), 269-280. <https://doi.org/10.1177/002246699202600304>
- Peña, E., Iglesias, A., & Lidz, C. S. (2001). Reducing test bias through dynamic assessment of children's word learning ability. *American Journal of Speech-Language Pathology*, 10(2), 138-154. <http://dx.doi.org/10.1044/1058-0360%282001/014%29>
- Peña, E. D. (2000). Measurement of modifiability in children from culturally and linguistically diverse backgrounds. *Communication Disorders Quarterly*, 21(2), 87-97. <http://dx.doi.org/10.1177/152574010002100203>

- Peña, E. D., Gillam, R. B., & Bedore, L. M. (2014). Dynamic assessment of narrative ability in English accurately identifies language impairment in English language learners. *Journal of Speech Language & Hearing Research, 57*(6), 2208-2220. [https://dx.doi.org/10.1044/2014\\_JSLHR-L-13-0151](https://dx.doi.org/10.1044/2014_JSLHR-L-13-0151)
- Peña, E. D., Gillam, R. B., Malek, M., Ruiz-Felter, R., & et al. (2006). Dynamic assessment of school-age children's narrative ability: An experimental investigation of classification accuracy. *Journal of Speech, Language, and Hearing Research, 49*(5), 1037-1057. [https://doi.org/10.1044/1092-4388\(2006/074\)](https://doi.org/10.1044/1092-4388(2006/074))
- Peña, E. D., Resendiz, M., & Gillam, R. B. (2007). The role of clinical judgments of modifiability in the diagnosis of language impairment. *Advances in Speech Language Pathology, 9*(4), 332-345. <http://dx.doi.org/10.1080/14417040701413738>
- Petersen, D. B., Chanthongthip, H., Ukrainetz, T. A., Spencer, T. D., & Steeve, R. W. (2017). Dynamic assessment of narratives: Efficient, accurate identification of language impairment in bilingual students. *Journal of Speech Language & Hearing Research, 60*(4), 983-998. [https://dx.doi.org/10.1044/2016\\_JSLHR-L-15-0426](https://dx.doi.org/10.1044/2016_JSLHR-L-15-0426)
- Petersen, D. B., & Gillam, R. B. (2015). Predicting reading ability for bilingual Latino children using dynamic assessment. *Journal of Learning Disabilities, 48*(1), 3-21. <https://dx.doi.org/10.1177/0022219413486930>
- Petersen, D. B., Tonn, P., Spencer, T. D., & Foster, M. E. (2020). The classification accuracy of a dynamic assessment of inferential word learning for bilingual English/Spanish-speaking school-age children. *Language, Speech and Hearing Services in Schools, 51*(1), 144-164. [http://dx.doi.org/10.1044/2019\\_LSHSS-18-0129](http://dx.doi.org/10.1044/2019_LSHSS-18-0129)
- Regalla, M., & Peker, H. (2017). Prompting all students to learn: Examining dynamic assessment of special needs and typical students in a prekindergarten inclusive French program. *Foreign Language Annals, 50*(2), 323-338. <http://dx.doi.org/10.1111/flan.12261>
- Resendiz, M., & Peña, E. (2015). Dynamic assessment with English language learners. *Dialog: Journal of the Texas Educational Diagnosticians Association, 44*(1).
- Roseberry, C. A., & Connell, P. J. (1991). The use of an invented language rule in the differentiation of normal and language-impaired Spanish-speaking children. *Journal of Speech, Language, and Hearing Research, 34*(3), 596-603. <https://doi.org/10.1044/jshr.3403.596>
- Snell, M. E. (2002). Using dynamic assessment with learners who communicate nonsymbolically. *AAC: Augmentative & Alternative Communication, 18*(3), 163-176. <https://doi.org/10.1080/07434610212331281251>
- Spencer, T. D., Petersen, D. B., & Adams, J. L. (2015). Tier 2 language intervention for diverse preschoolers: An early-stage randomized control group study following an analysis of response to intervention. *American Journal of Speech-Language Pathology, 24*(4), 619-636. [https://dx.doi.org/10.1044/2015\\_AJSLP-14-0101](https://dx.doi.org/10.1044/2015_AJSLP-14-0101)
- Steele, S. C. (2015). Does language learning disability in school-age children affect semantic word learning when reading? *International Journal of Speech-Language Pathology, 17*(2), 172-184. <https://dx.doi.org/10.3109/17549507.2014.979872>
- Steele, S. C., Willoughby, L. M., & Mills, M. T. (2013). Learning word meanings during reading: Effects of phonological and semantic cues on children with language impairment. *International Journal of Speech-Language Pathology, 15*(2), 184-197. <http://dx.doi.org/10.3109/17549507.2012.700322>
- Strand, E. A., McCauley, R. J., Weigand, S. D., Stoeckel, R. E., Baas, B. S., Kreiman, J., & Liss, J. (2013). A motor speech assessment for children with severe speech disorders: Reliability and validity evidence. *Journal of Speech, Language & Hearing Research, 56*(2), 505-520. [https://doi.org/10.1044/1092-4388\(2012/12-0094\)](https://doi.org/10.1044/1092-4388(2012/12-0094))
- Thomas, D., Lance, D. M., & Rainey, J. L. (2018). Phonemic awareness assessment of children with and without speech sound disorders: A comparison study. *Clinical Archives of Communication Disorders, 3*(2), 113-126. <https://doi.org/10.21849/cacd.2018.00346>
- Tyler, A. A. (1996). Assessing stimulability in toddlers. *Journal of Communication Disorders, 29*(4), 279-297. [https://doi.org/10.1016/0021-9924\(96\)00018-4](https://doi.org/10.1016/0021-9924(96)00018-4)
- Tzuriel, D., & Groman, T. (2017). Dynamic assessment of figurative language of children in the autistic spectrum: The relation to some cognitive and language aspects. *Journal of Cognitive Education and Psychology, 16*(1), 38-63. <http://dx.doi.org/10.1891/1945-8959.16.1.38>
- Ukrainetz, T. A., Harpell, S., Walsh, C., & Coyle, C. (2000). A preliminary investigation of dynamic assessment with Native American kindergartners. *Language, Speech and Hearing Services in the Schools, 31*(2), 142-154. <https://dx.doi.org/10.1044/0161-1461.3102.142>
- Wade, K. M., & Haynes, W. O. (1989). Dynamic assessment of spontaneous language and cue responses in adult-directed and child-directed play: A statistical and descriptive analysis. *Child Language Teaching and Therapy, 5*(2), 157-173. <https://doi.org/10.1177/026565908900500204>
- Weismer, S. E., Murray-Branch, J., & Miller, J. F. (1993). Comparison of two methods for promoting productive vocabulary in late talkers. *Journal of Speech and Hearing Research, 36*(5), 1037-1050. <https://doi.org/10.1044/jshr.3605.1037>
